# Supplementary material for: Fullerene-Decorated PdCo Nano-Resistor Network Hydrogen Sensors: Sub-Second Response and Part-per-Trillion Detection at Room Temperature
Source: Research Square preprint supplement (doi:10.21203/rs.3.rs-5599691/v1), 2024-12-24
Supplement: Supplementary file 1 [file 3cfc3642e578d5d4fc238223.pdf]

## Supplemental Information

### **Fullerene-Decorated PdCo Nano-Resistor Network Hydrogen Sensors: Sub-Second Response and Part-per-Trillion Detection at Room Temperature**

Tu Anh Ngo<sup>a,\*</sup>, Ashwin T. Magar<sup>a</sup>, Minh T. Pham<sup>a</sup>, Hoang M. Luong<sup>a</sup>, George Larsen<sup>b</sup>, Yiping Zhao<sup>a</sup>, and Tho D. Nguyen<sup>a,\*</sup>

<sup>a</sup> *Department of Physics and Astronomy, University of Georgia, Athens, Georgia 30602, USA.*

<sup>b</sup> *Hydrogen Isotope Science Group, Savannah River National Laboratory, Aiken, South Carolina 29808, USA.*

<sup>\*</sup> *Corresponding author*

*Correspondence to: [anhngo@uga.edu](mailto:anhngo@uga.edu) (T. A. Ngo), [ngtho@uga.edu](mailto:ngtho@uga.edu) (T. D. Nguyen).*

#### **KEYWORDS**

electrical hydrogen gas sensor, PdCo composite, nanohole arrays, Fullerene C<sub>60</sub>, Teflon AF

|    |                                                                                          |    |
|----|------------------------------------------------------------------------------------------|----|
| 1  | Table of Contents                                                                        |    |
| 2  | S1. State-of-the-art Pd-based H <sub>2</sub> sensors .....                               | 3  |
| 3  | S2. SEM and EDS elemental mapping images .....                                           | 6  |
| 4  | S3. Hydrogen sensing characterization setups.....                                        | 7  |
| 5  | S3. Sensing characteristics of PdCo thin films .....                                     | 9  |
| 6  | S5. CHAs with different etching time $t_{RIE}$ .....                                     | 13 |
| 7  | S5.1. Morphology characterization and glancing angle deposition (GLACD) simulation ..... | 13 |
| 8  | S5.2. Surface-to-volume (SVR) ratio calculation .....                                    | 16 |
| 9  | S5.3. Resistivity model.....                                                             | 18 |
| 10 | S5.4. Sensing characteristics of CHAs with different etching time $t_{RIE}$ .....        | 20 |
| 11 | S6. Noise evaluation .....                                                               | 26 |
| 12 | S7. Interference gases and humidity tests .....                                          | 27 |
| 13 | S8. Pressure transducer's reaction time .....                                            | 28 |
| 14 | Supplementary references .....                                                           | 29 |
| 15 |                                                                                          |    |
| 16 |                                                                                          |    |

1    **S1. State-of-the-art Pd-based H<sub>2</sub> sensors**

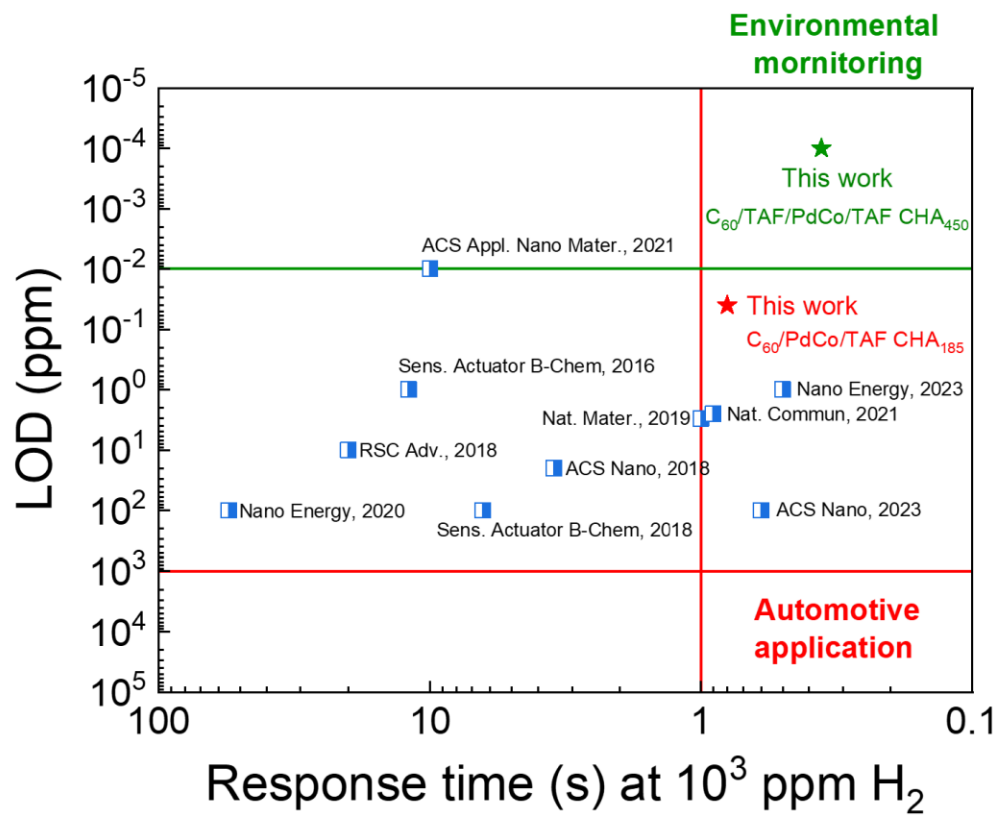

**Figure S1.** State-of-the-art Pd-based hydrogen gas sensors' sensing metrics. The response time and LOD requirements for automotive<sup>1</sup> and environmental monitoring<sup>2</sup> applications are denoted in red and green lines, respectively.

2

|                             |                    |                             |                    |
|-----------------------------|--------------------|-----------------------------|--------------------|
| Sens. Actuator B-Chem, 2016 | Ref. <sup>3</sup>  | Nano Energy, 2020           | Ref. <sup>4</sup>  |
| RSC Adv., 2018              | Ref. <sup>5</sup>  | ACS Appl. Nano Mater., 2021 | Ref. <sup>6</sup>  |
| ACS Nano, 2018              | Ref. <sup>7</sup>  | Nat. Commun, 2021           | Ref. <sup>8</sup>  |
| Sens. Actuator B-Chem, 2018 | Ref. <sup>9</sup>  | Nano Energy, 2023           | Ref. <sup>10</sup> |
| Nat. Mater., 2019           | Ref. <sup>11</sup> | ACS Nano, 2023              | Ref. <sup>12</sup> |

3

- 1 **Table S1.** Sensing metrics of electrical H<sub>2</sub> gas sensors operating at room temperature with either  
 2 response time < 30 s at 1 mbar (or 0.1 vol.%) H<sub>2</sub> or LOD < 1000 ppm. n.a. = not addressed.

| Device structure                                                | Response time (s) (t <sub>90</sub> if not specified) | Ambient pressure (mbar) | LOD (ppm - if not specified) | Sensor's hysteresis-free behavior | Resistance to poisoning gases | Ref.      |
|-----------------------------------------------------------------|------------------------------------------------------|-------------------------|------------------------------|-----------------------------------|-------------------------------|-----------|
| C <sub>60</sub> /PdCo/Teflon AF/PMMA<br>CHA <sub>185</sub>      | ≤ 0.8                                                | 1                       | 40 ppb                       | Yes                               | Yes                           | This work |
| C <sub>60</sub> /Teflon AF/PdCo/Teflon AF<br>CHA <sub>450</sub> | ≤ 0.36                                               | 1                       | 100 ppt                      |                                   |                               | This work |
| PMMA-coated Pd-Co nanohole array                                | 10.8                                                 | 1                       | <0.01                        | Yes                               | Yes                           | 6         |
| Hollow Pd nanotube network (PVA@Pd8)                            | 2.1                                                  | 1                       | 10                           | n.a.                              | Yes                           | 13        |
| Pd-Ni alloy thin films                                          | t <sub>63</sub> = 5                                  | 10                      | n.a.                         | n.a.                              | n.a.                          | 14        |
| Palladium nanowire engineered nanofiltration                    | 13                                                   | 1                       | 1000                         | n.a.                              | n.a.                          | 15        |
| Ultrasmall grained Pd nanopattern                               | 12                                                   | 30                      | 2.5                          | n.a.                              | n.a.                          | 16        |
| Pd-capped Mg film                                               | 6                                                    | 10                      | 1                            | n.a.                              | n.a.                          | 17        |
| Pd@Au core-shell nanoparticles                                  | 15                                                   | 200                     | 1000                         | n.a.                              | n.a.                          | 18        |
| Networks of ultrasmall palladium nanowires                      | ~25                                                  | 1                       | n.a.                         | n.a.                              | n.a.                          | 19        |
| Pd-decorated silicon nanomesh                                   | t <sub>80</sub> ~ 10                                 | 1                       | 50                           | n.a.                              | n.a.                          | 20        |
| SiO <sub>2</sub> nanorod coated-Pd                              | 17                                                   | 10                      | 10                           | n.a.                              | n.a.                          | 21        |
| Pt-TiO <sub>2</sub>                                             | 10 ± 5                                               | 1                       | 30                           | n.a.                              | n.a.                          | 22        |
| polyurethane@Pd                                                 | 24                                                   | 1                       | 20                           | n.a.                              | n.a.                          | 23        |
| Pd nanowires                                                    | 25                                                   | 1                       | 50                           | n.a.                              | n.a.                          | 24        |
| Pd NP/graphene                                                  | 300                                                  | 1                       | 20                           | n.a.                              | n.a.                          | 25        |
| PdNi Nanogap                                                    | 0.5                                                  | 20                      | 500                          | n.a.                              | n.a.                          | 26        |
| Discontinuous palladium films on Polyimide                      | 5                                                    | 40                      | 5000                         | n.a.                              | n.a.                          | 27        |

|                                                              |     |      |                 |      |      |               |
|--------------------------------------------------------------|-----|------|-----------------|------|------|---------------|
| Pd nanorod                                                   | 7   | n.a. | 1000            | n.a. | n.a. | <sup>28</sup> |
| Pd nanoparticles                                             | 1.2 | 10   | 10 <sup>4</sup> | n.a. | n.a. | <sup>29</sup> |
| Pd nanoparticles<br>coated Multi-Walled<br>Carbon Nano Tubes | 15  | 300  | n.a.            | n.a. | n.a. | <sup>30</sup> |

1

## 1 S2. SEM and EDS elemental mapping images

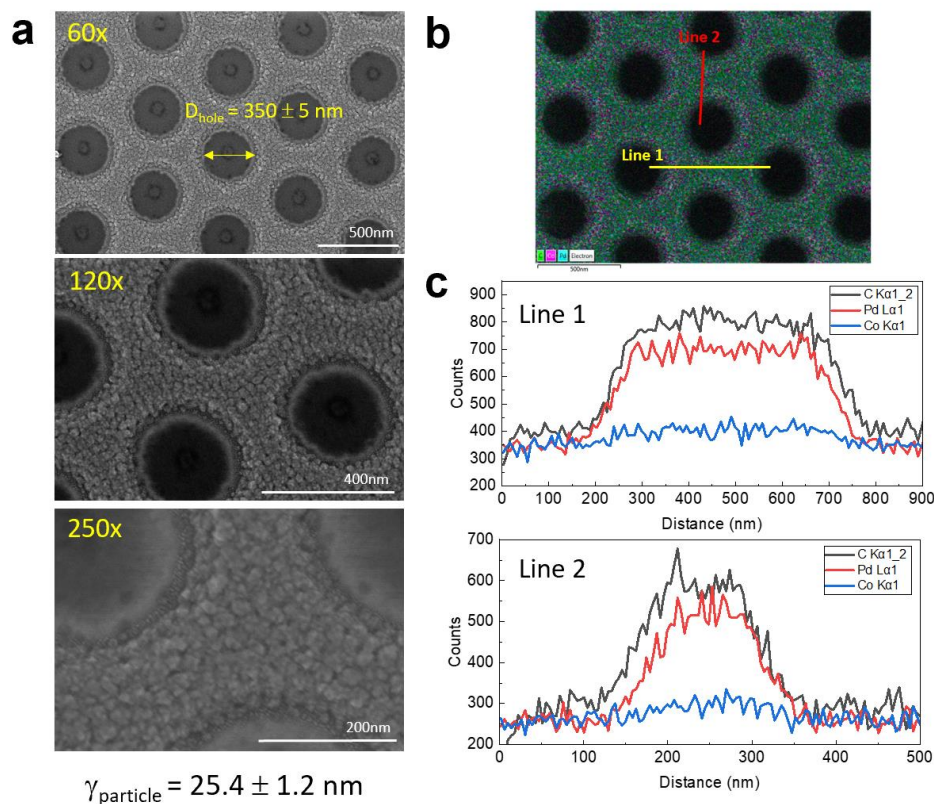

**Figure S2.** (a) SEM images of 20 nm C<sub>60</sub>/5 nm PdCo CHA<sub>450</sub> (hole diameter  $D_{\text{hole}} = 350 \pm 5 \text{ nm}$ ) at different magnifications. The estimated diameter of the PdCo particles on the surface is  $\gamma_{\text{particle}} = 25.4 \pm 1.2 \text{ nm}$ . (b) Energy-dispersive spectroscopy (EDS) elemental layered mapping. (c) EDS line spectra along two lines denoted in (b). Counts are based on weight percentages.

**Table S2.** Weight % to atomic % conversion table

| Elements  | Map (Fig. S2b) |       | Line 1 (Fig. S2c) |                | Line 2 (Fig. S2c) |                |
|-----------|----------------|-------|-------------------|----------------|-------------------|----------------|
|           | Wt. %          | At. % | Wt. %             | At. %          | Wt. %             | At. %          |
| <b>C</b>  | 79.5           |       | $7.15 \pm 0.11$   |                | $9.28 \pm 0.13$   |                |
| <b>Pd</b> | 15.4           | 63    | $0.87 \pm 0.02$   | $67.7 \pm 5.8$ | $0.58 \pm 0.02$   | $62.8 \pm 7.0$ |
| <b>Co</b> | 5.1            | 37    | $0.24 \pm 0.02$   | $33.3 \pm 2.9$ | $0.19 \pm 0.02$   | $37.2 \pm 4.1$ |

### 1 S3. Hydrogen sensing characterization setups

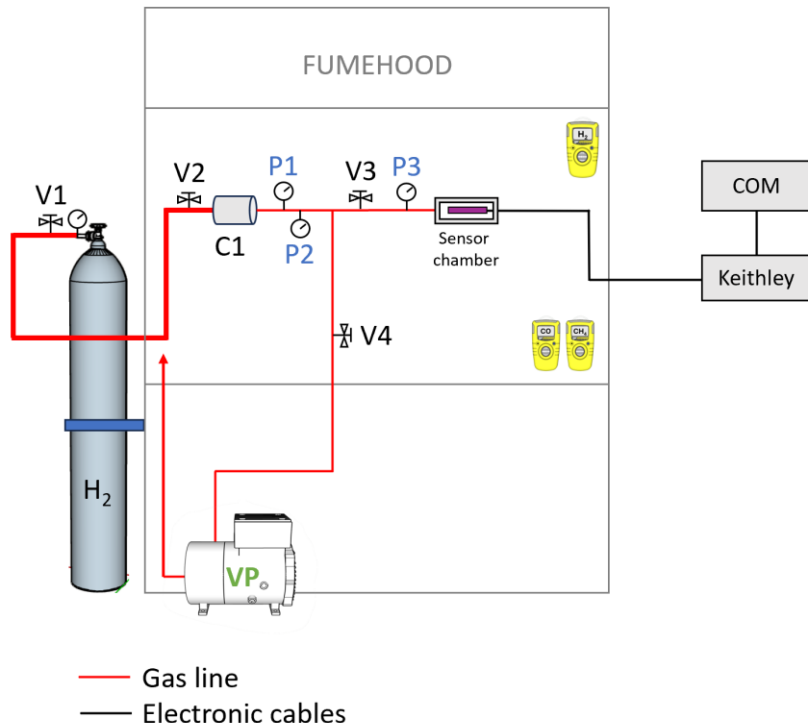

**Figure S3.** H<sub>2</sub> electrical sensing vacuum mode setup.

The vacuum mode set up is depicted in **Figure S3**. Different H<sub>2</sub> gas pressure in the sensor chamber can be prepared by recurrently diluting pure H<sub>2</sub> gas or the gas mixture of 4% H<sub>2</sub> in N<sub>2</sub> (Airgas) from chamber 1 (C1) to the sensor chamber by several gas valves (V1-V3). The H<sub>2</sub> pressures are monitored by three independent pressure transducers (two PX409-USBH, Omega and a Baratron, MKS). Finally, the chamber sensor is isolated to C1, and the gas inside the chamber is pumped out using valve V4 to achieve the base pressure of  $\sim 5 \times 10^{-4}$  mbar in the chamber. The resistance of the sensors is recorded during the process using 4-point probe measurement by a Keithley 2635B current source. In order to further exploring the measurement at a lower H<sub>2</sub> pressure, 4% or 100 ppm of H<sub>2</sub> mixed gas in N<sub>2</sub> balance can be used. In this case, we can prepare a mixture gas with H<sub>2</sub> pressure in sensor chamber down to 1 mbar, which is equivalent to partial hydrogen pressure/concentration of 40 ppm or 100 ppb, respectively. In order to probe at lower H<sub>2</sub>

1 concentrations (a few ppb or ppt level), we will need to utilize further diluted H<sub>2</sub> gas as the gas  
 2 source.

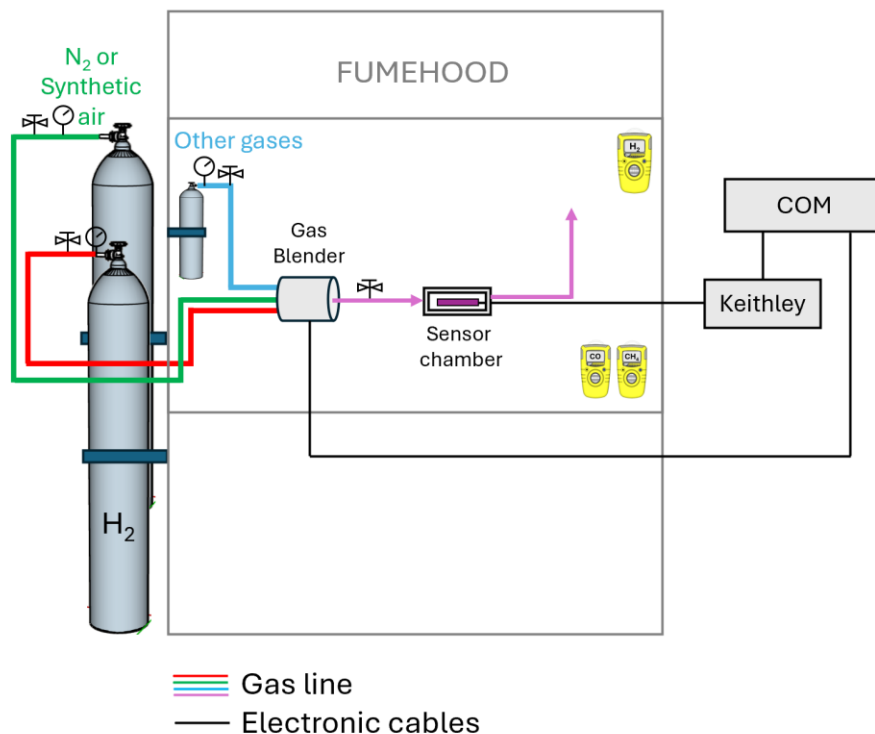

**Figure S4.** H<sub>2</sub> electrical sensing flow mode setup.

3  
 4 In addition to the vacuum mode setup, the gas sensing measurement is also performed in  
 5 flow mode to mimic the leakage (Figure S4). 4% H<sub>2</sub> balance in N<sub>2</sub> are further diluted with ultra-  
 6 high purity N<sub>2</sub> gas to the targeted concentrations  $\leq 4$  vol. % H<sub>2</sub> by a commercial gas blender (GB-  
 7 103, MCQ Instruments). The gas flow rate is kept constant at 400 ml/min or 400 sccm at 1 atm for  
 8 all measurements. The gas cell and gas outlet are placed inside a fume hood during the  
 9 measurement.



### 1 S3. Sensing characteristics of PdCo thin films

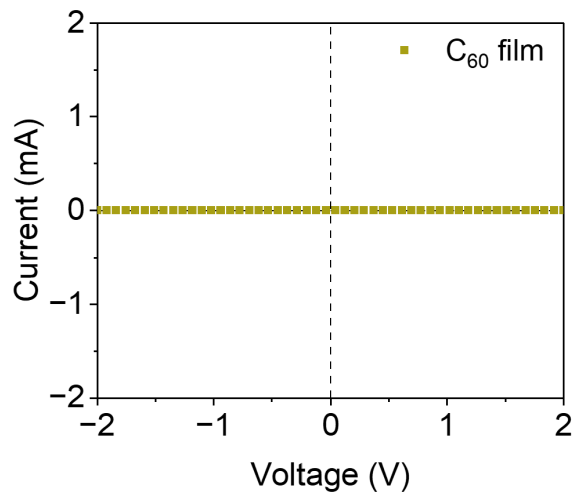

**Figure S5.** I-V characteristics of C<sub>60</sub> film.

2

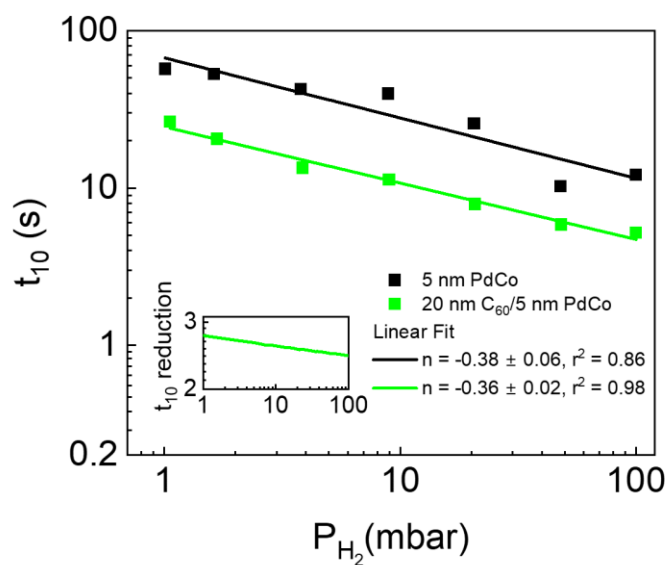

**Figure S6.** Desorption time  $t_{10}$  of 5 nm PdCo and 20 nm C<sub>60</sub>/5 nm PdCo thin films.

3

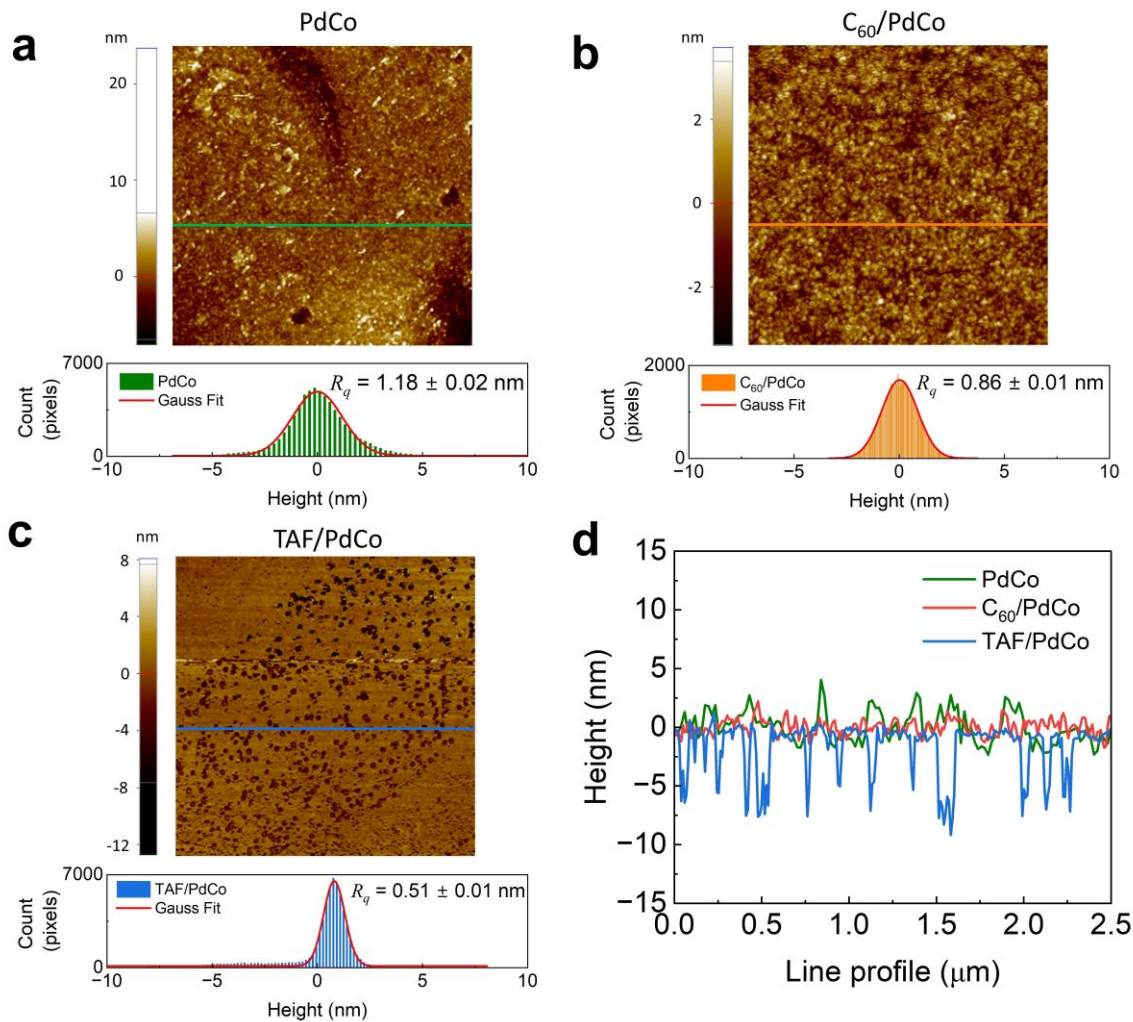

**Figure S7.** AFM images of 5 nm PdCo thin film on (a) a glass substrate, (b) a 50-nm C<sub>60</sub>-coated glass substrate, (c) a 30-nm TAF-coated glass substrate and the corresponding histograms. (d) The line profiles across the films extracted from figures (a-c).

# 1 S4. Sensing characteristics of CHAs on different C<sub>60</sub> thicknesses

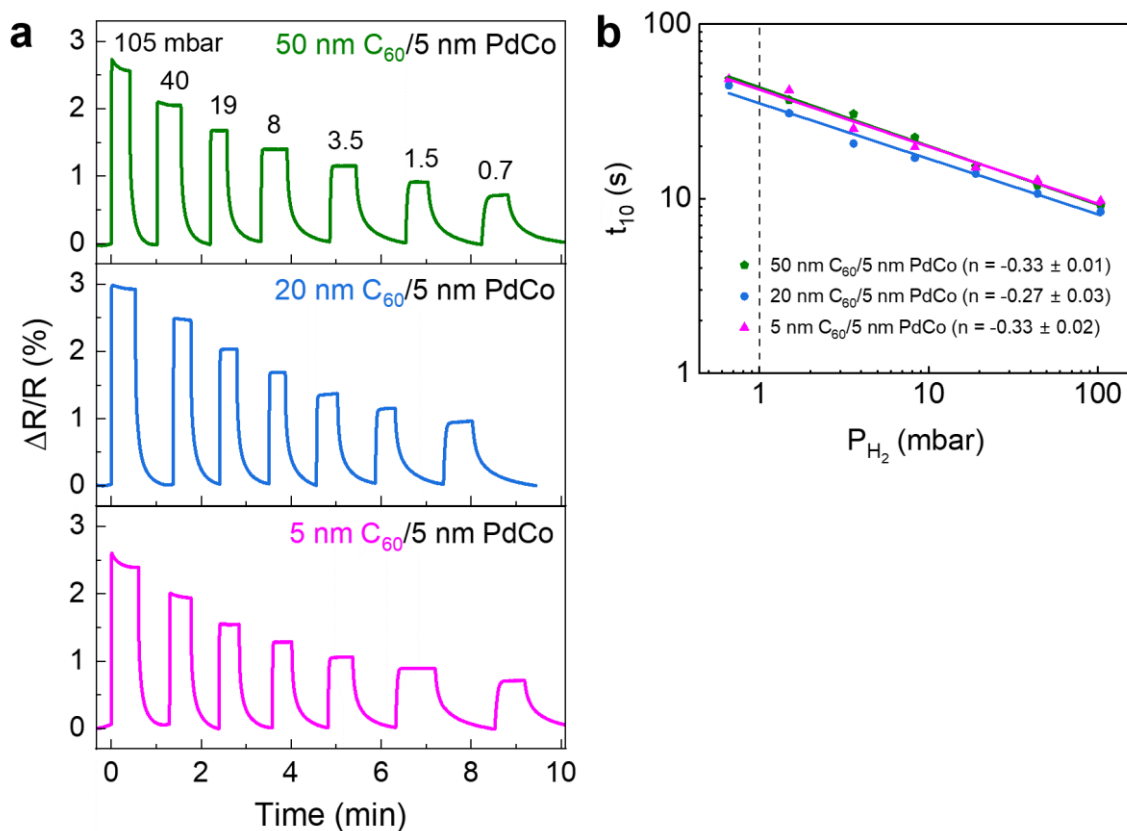

**Figure S8. Sensing performances of C<sub>60</sub>/5 nm PdCo CHA<sub>450</sub> sensors with different C<sub>60</sub> thicknesses.** (a) Sorption dynamics in response to step wise decreasing H<sub>2</sub> pressure from 105 to 0.7 mbar. (b) Release time  $t_{10}$  extracted from (a). All measurements were performed in vacuum mode at room temperature.

2

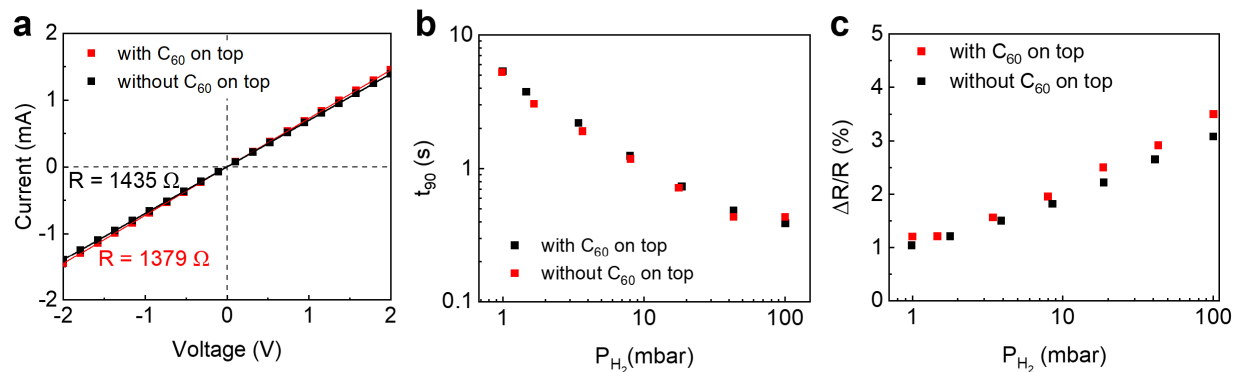

**Figure S9.** Sensing performances of 20 nm C<sub>60</sub>/5 nm PdCo CHA<sub>300</sub> sensors with and without 20 nm C<sub>60</sub> on top. (a) I-V characteristics, (b) response time  $t_{90}$  and (c) sensitivity of the sensors in response to step wise decreasing H<sub>2</sub> pressure from 100 to 1 mbar. All measurements were performed in vacuum mode at room temperature.

## 1 S5. CHAs with different etching time $t_{\text{RIE}}$

### 2 S5.1. Morphology characterization and glancing angle deposition (GLACD) simulation

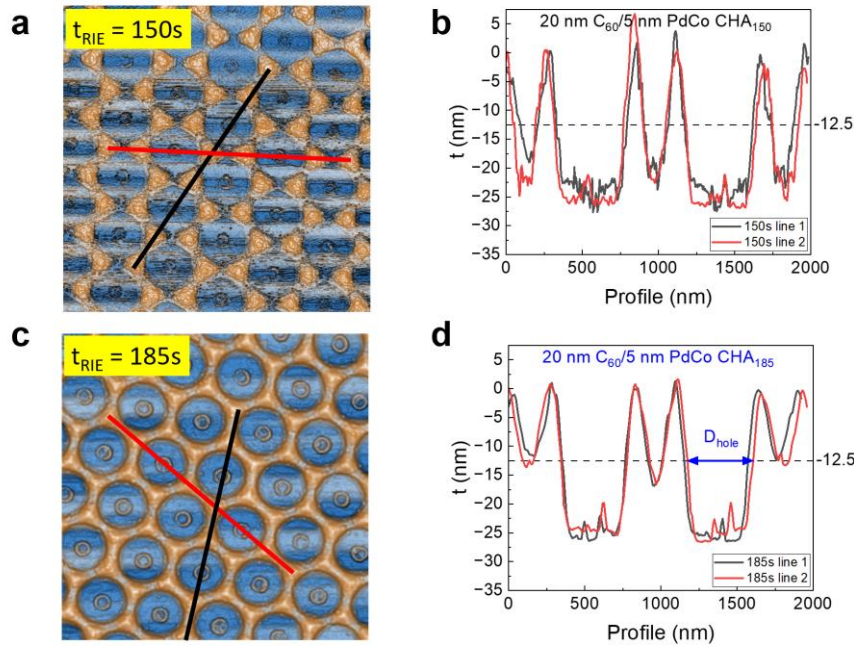

**Figure S10.** (a)(c) Top-view AFM image of CHA<sub>150</sub> and CHA<sub>185</sub> and (b)(d) the corresponding line profile along 2 lines denoted in (a)(c). The hole diameter  $D_{\text{hole}}$  is extracted from the middle of the hole and is averaged from 4 holes as depicted in (d).

3  
4 When etching time  $< 160\text{ s}$  (Fig. S10 a&b), a nanotriangle array was achieved instead of a nanohole  
5 array due to the pronounced shadow effect from the big PS beads, resulting in a discontinuous  
6 nano network. The hole diameters of all CHAs were extracted from AFM line profiles (similar to  
7 CHA<sub>185</sub> depicted in Fig. S10c&d) and summarized in Table S3.  $D_{\text{hole}}$  was then used as input  
8 parameters for GLACD simulation.<sup>31</sup>

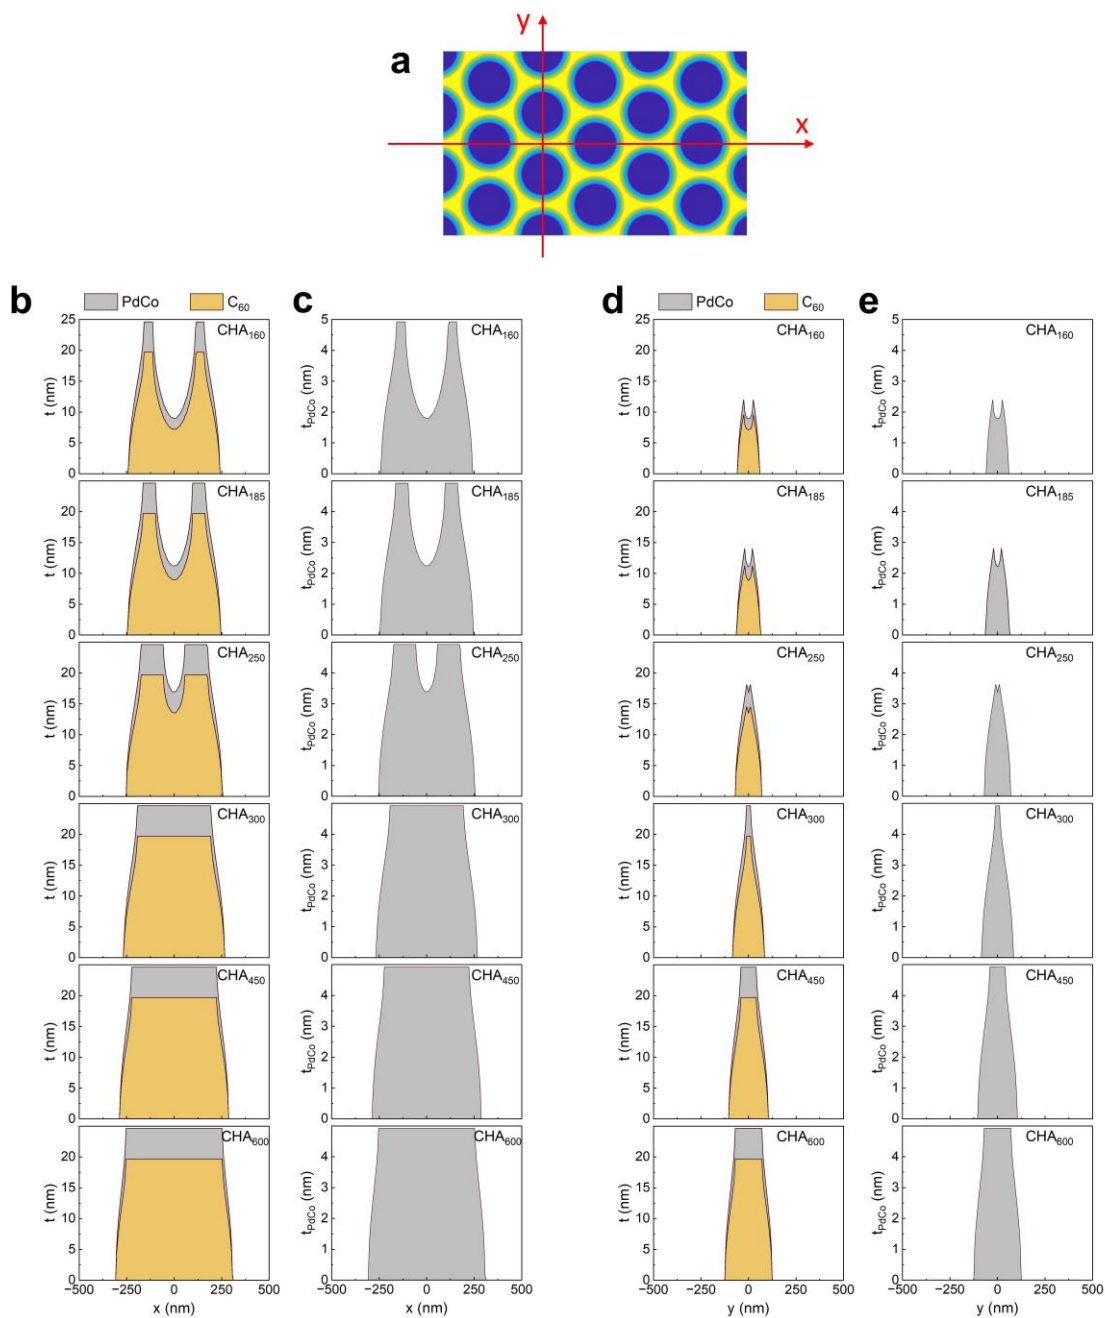

**Figure S11.** (a) Simulated hole array diagram and the bottleneck cross-section for each CHA<sub>t</sub> along (b) the x-axis and (d) the y-axis denoted in (a). (c) and (e) are the thicknesses of the PdCo layer in (b) and (d) projected on a flat substrate.

1  
2  
3



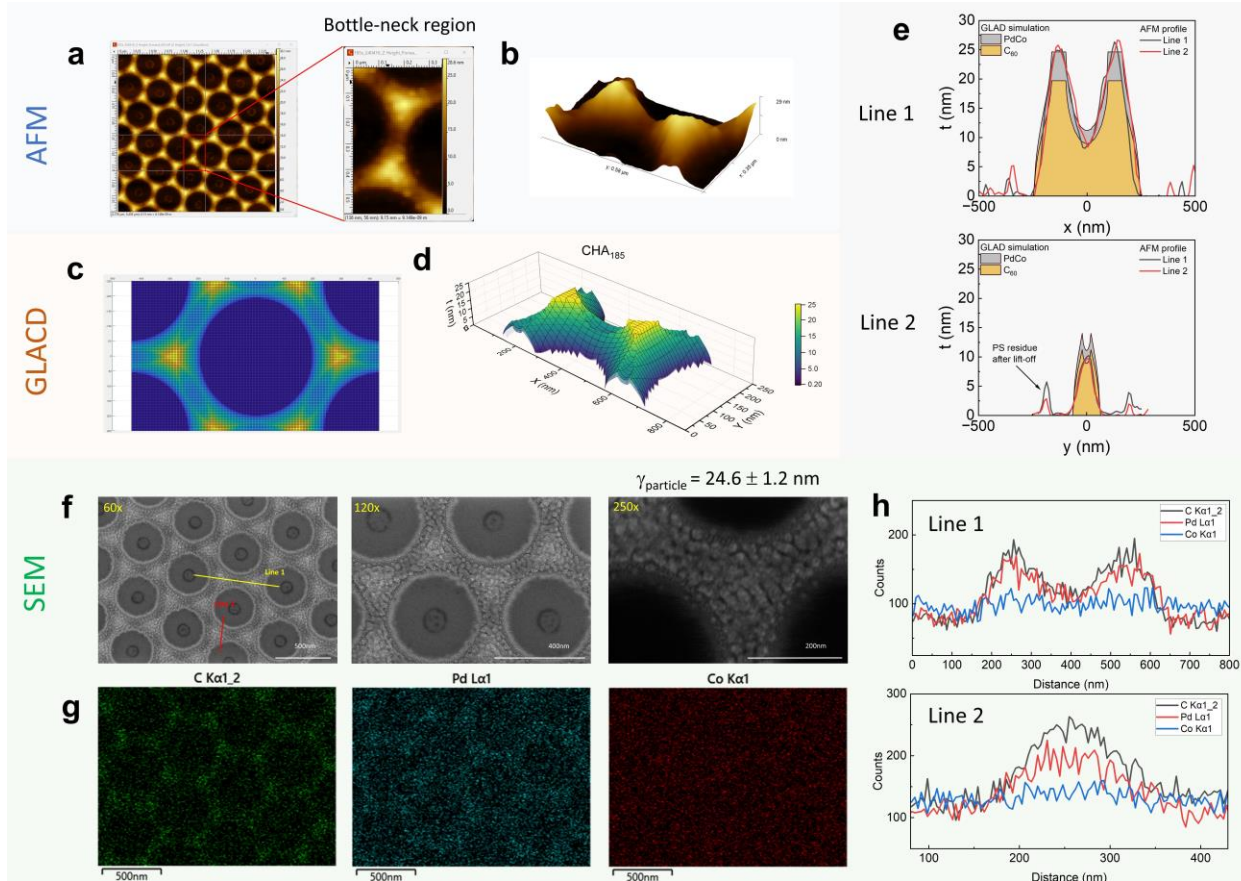

**Figure S12. Comparison between GLACD simulation and data from AFM and SEM.** (a) Top-view and (b) side-view AFM images of CHA<sub>185</sub>. (c) Top-view and (d) side-view of CHA<sub>185</sub> from GLACD simulation. (e) Line profiles along (line 1) and across (line 2) the bottle-neck region. (f) SEM images of 20 nm C<sub>60</sub>/5 nm PdCo CHA<sub>185</sub> at different magnifications. The estimated diameter of PdCo grains on the surface is  $\gamma_{\text{particle}} = 24.6 \pm 1.2$  nm. (g) Energy-dispersive spectroscopy (EDS) elemental mapping. (h) EDS line spectra along (line 1) and across (line 2) the bottle-neck region denoted in (f). Counts are based on weight percentages.

## S5.2. Surface-to-volume (SVR) ratio calculation

The morphology of each layer in CHAs was simulated using an in-house glancing angle deposition simulation.<sup>31</sup> The result of the simulation on the substrate for one unit cell is depicted in Fig. S12c with a resolution of 173 x 100 pixels<sup>2</sup>. For polystyrene (PS) monolayer with a bead diameter of 500 nm, each pixel has a size of 5 x 5 nm<sup>2</sup>. The color bar represents the thickness  $t$  of the deposited materials. The morphology of each layer can be illustrated as a 3D surface (Fig. S12d), and its surface area is calculated using *surfacearea* function in MATLAB.<sup>32</sup> The total surface area of PdCo layer can be calculated as

$$\text{Total PdCo surface} = \text{Top surface area of PdCo} + \text{Top surface area of C}_{60}. \quad (\text{S1})$$

The volume of each layer is  $V_{\text{layer}} = 5 \times 5 \times t$  (nm<sup>3</sup>), thus the volume of PdCo layer is

$$V_{\text{PdCo}} = V_{\text{total}} - V_{\text{C}_{60}}, \quad (\text{S2})$$

Where  $V_{\text{total}}$  is total volume of the device C<sub>60</sub>/PdCo and  $V_{\text{C}_{60}}$  is volume of the C<sub>60</sub> layer only.

Finally, the surface-to-volume ratio is calculated as

$$\text{SVR} = \text{Total PdCo surface} / V_{\text{PdCo}}. \quad (\text{S3})$$



1 **Table S3.** Summary of all parameters of 20 nm  $C_{60}$ /5 nm PdCo  $CHA_{t_{RIE}}$  extracted from AFM  
2 images and GLACD simulations.

| Etching time | Hole diameter | Bottle-neck width | Bottle-neck thickness of PdCo | Cross-sectional area | Bottle-neck length | Surface to volume ratio | Resistance        |                |
|--------------|---------------|-------------------|-------------------------------|----------------------|--------------------|-------------------------|-------------------|----------------|
| $t_{RIE}$    | $D_{hole}$    | $w$               | $h_{PdCo}$                    | $A_{bottleneck}$     | $l$                | SVR                     | $R_{without TAF}$ | $R_{with TAF}$ |
| s            | nm            | nm                | nm                            | $nm^2$               | nm                 | $nm^{-1}$               | $\Omega$          | $\Omega$       |
| 160          | $460 \pm 3$   | 40                | 2.00                          | 1463.96              | 220                | 0.82                    | 7062300           | 1889203        |
| 185          | $450 \pm 4$   | 50                | 2.46                          | 1648.88              | 201                | 0.75                    | 17744             | 15003          |
| 250          | $430 \pm 8$   | 70                | 3.55                          | 2011.55              | 160                | 0.66                    | 2835              | 2430           |
| 300          | $404 \pm 2$   | 96                | 4.92                          | 2294.89              | 392                | 0.58                    | 1503              | 1157           |
| 450          | $350 \pm 5$   | 150               | 4.92                          | 2540.55              | 450                | 0.50                    | 1093              | 1350           |
| 600          | $297 \pm 6$   | 203               | 4.92                          | 2786.28              | 512                | 0.46                    | 435               | 637            |

3

### S5.3. Resistivity model

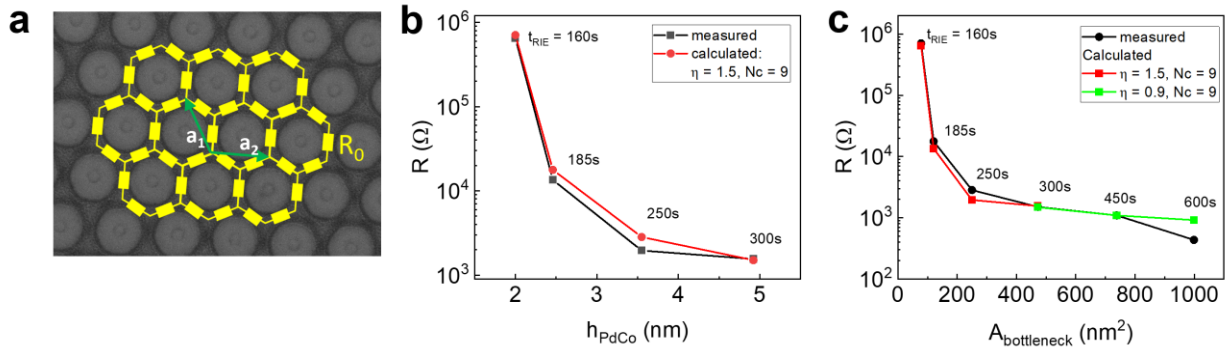

**Figure S13. Resistivity model for 20 nm C<sub>60</sub>/5 nm PdCo CHA<sub>t<sub>RIE</sub></sub>.** (a) Schematic of the infinite two-dimensional hexagonal lattice of identical resistors  $R_0$ . (b)(c) Comparison between thickness-dependent resistance and Lacy's model (Ref. 7).

A hexagonal CHA structure can be considered as an infinite honeycomb resistor network of identical unit resistors (Fig. S13a); and its resistance  $R_{NH}$  is directly proportional to the elementary resistance  $R_0$ :

$$R_{NH} = NR_0, \quad (S4)$$

where the constant  $N$  is determined by

$$N = \frac{3}{4\pi^3} \int_{-\pi}^{\pi} \int_{-\pi}^{\pi} \frac{1 - \cos(mx + ny)}{3 - \cos(x) - \cos(y) - \cos(x+y)} dx dy. \quad (S5)$$

$R_{NH}$ , here, is calculated spaced; the origin (0,0) and a given lattice point (m,n) of a two-dimensional hexagonal resistor network.<sup>33</sup> Since the clip test's pins using for 4-point-probe measurements are equally spaced,  $N$  should be a constant and has the same value for all devices. The effective resistance of the elementary resistor can be estimated by the following equation:

$$R_0 = \rho \frac{l}{w \cdot h_{PdCo}} \quad (S6)$$

with  $\rho$  is the resistivity of PdCo alloy;  $l$ ,  $w$ , and  $h_{PdCo}$  are the length, width, and thickness of PdCo layer (Table S2). Note that the value of the elementary resistance is determined solely by the intersection of the narrowest ( $w$ ) and thinnest bottleneck region ( $h_{PdCo}$ ).<sup>6</sup>

When the film thickness  $h_{PdCo}$  is smaller than the electronic mean free path in bulk  $l_{bulk}$ , the resistivity  $\rho$  is no longer a constant equal to the bulk resistivity  $\rho_0$ , but increases nonlinearly with the decrease of film's thickness. Lacy<sup>34</sup> had developed a general model that demonstrates the dependent of  $\rho$  on the film thickness, the surface roughness, and the grain boundary of the metallic thin film:

$$\rho = \frac{c\rho_0}{\kappa'(1-\ln(\kappa'))}, \quad (S8)$$

in which

$$\kappa' = \frac{t_{PdCo}-\eta}{2l_{bulk}}. \quad (S9)$$

In this model,  $c$  is a correction factor for the scattering from impurities in films ( $c > 1$ ), and  $\eta$  is a thickness correction factor that accounts for the scattering from the surfaces, grain boundaries and surface roughness ( $\eta < t_{PdCo}$ ). Thus,  $R_{NH}$  can be calculated using Lacy's model by substituting equations (S6 – S9) into (S4):

$$(R_{NH})_{calculated} = \frac{Nc}{\frac{t_{PdCo}-\eta}{2l_{bulk}}(1-\ln\frac{t_{PdCo}-\eta}{2l_{bulk}})} \rho_0 \frac{l}{wt_{PdCo}}. \quad (S10)$$

Using the values in Table S2 with fixed  $l_{bulk} = 20$  nm and  $\rho_0 = 6.72 \times 10^{-8}$  ( $\Omega m$ ), the thickness-dependent resistivities of  $CHA_{t_{RIE}}$  ( $t_{RIE} = 160$  s to 300 s) are shown in Fig. S13b. The theoretical model best fits experimental data when  $\eta = 1.5$  nm and  $Nc = 9.0$  for this regime. The small mismatch here could be explained by (i) the complexity of the CHA structure with non-uniformed film thickness and (ii) the assumption that the contribution of the triangle regions is negligible compared to the bottle-neck regions. For  $t_{RIE} > 300$  s,  $t_{PdCo}$  remains unchanged, therefore  $R_{NH}$  was plotted versus the cross-sectional area of the bottleneck region in Fig. S13c with  $\eta = 0.9$  nm and  $Nc = 9.0$ . Here, a smaller fitting parameter  $\eta$  than the ultra-thin film regime was used indicating that the scattering effects at the surface/grain boundaries/impurities is less serious in thicker films.

Overall, the non-linear dependency of CHAs' electrical resistance on the thickness or the bottleneck size being observed in the experiment was explained through Lacy's resistivity model.

#### S5.4. Sensing characteristics of CHAs with different etching time $t_{RIE}$

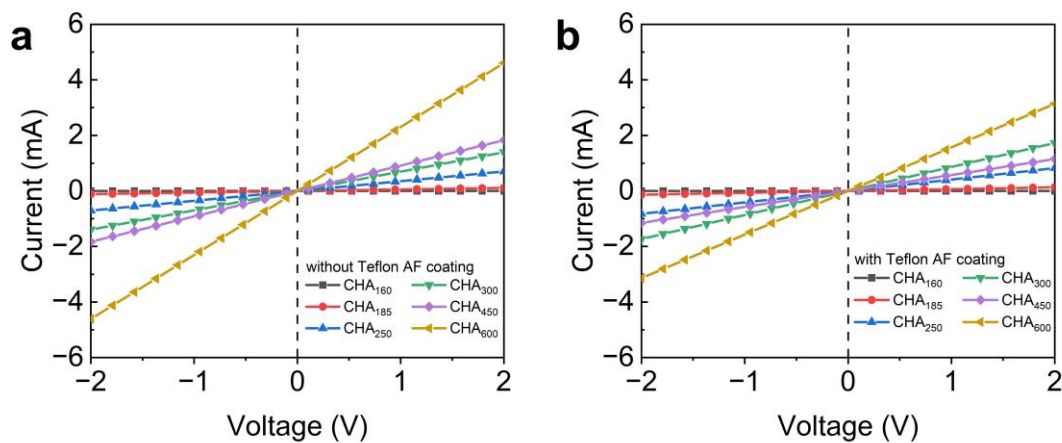

**Figure S14.** I-V characteristics of CHA<sub>t<sub>RIE</sub></sub> (a) without and (b) with TAF coating.

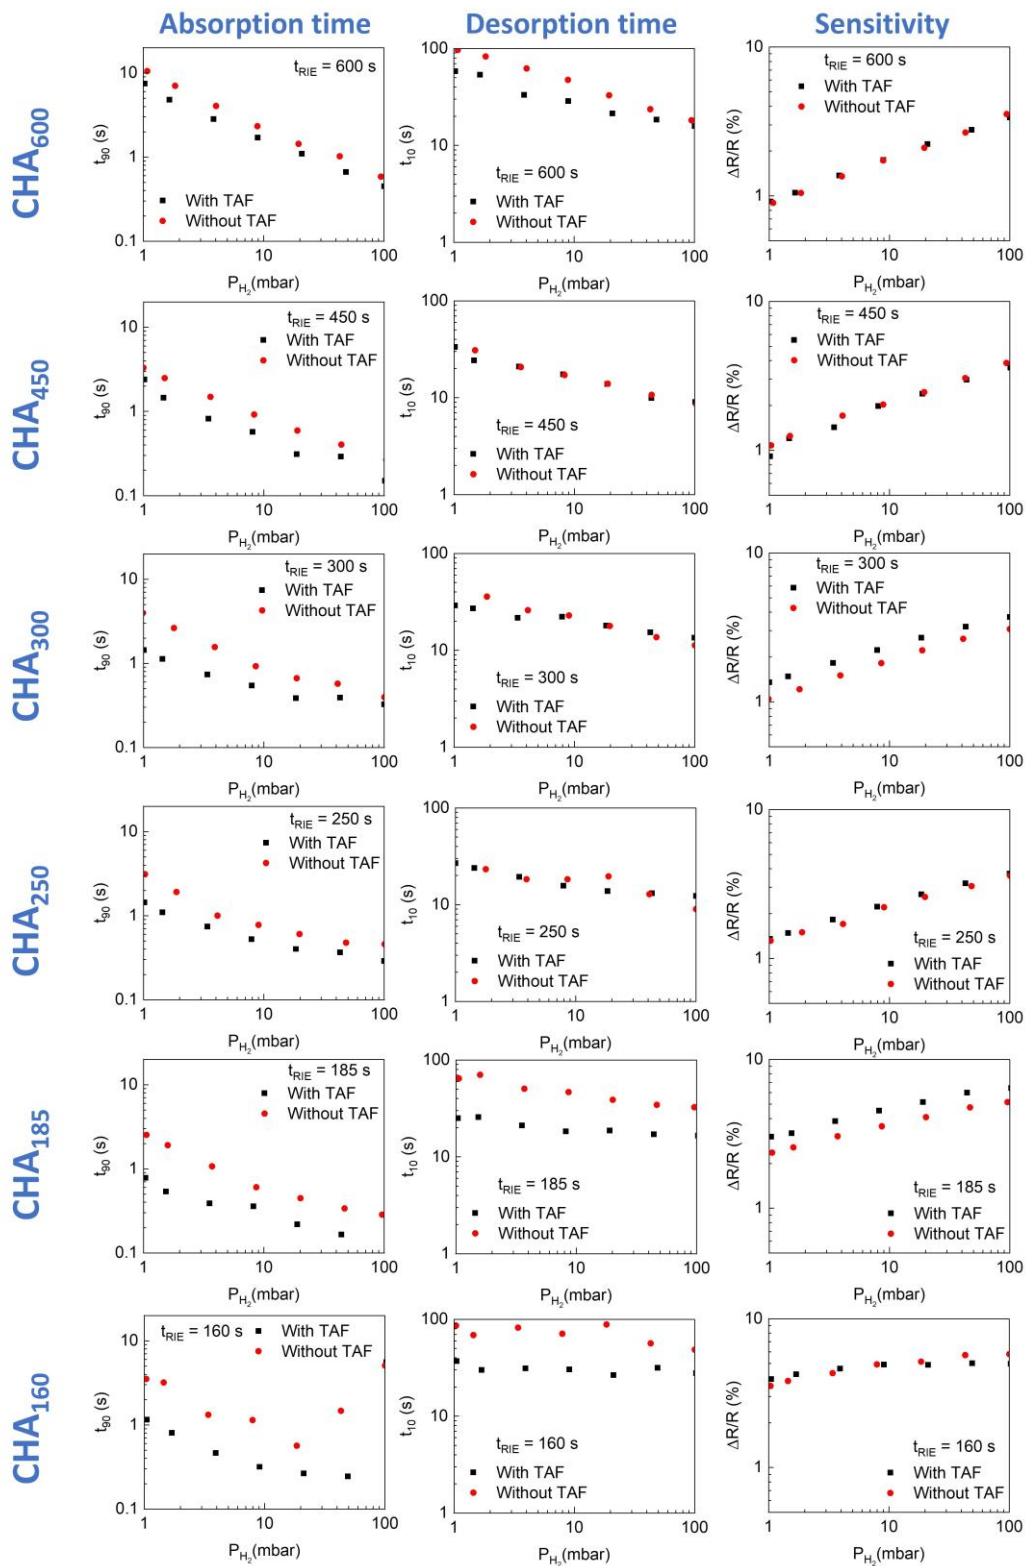

**Figure S15.** Absorption times, desorption times and sensitivities of 20 nm C<sub>60</sub>/5 nm PdCo/(30 nm TAF) CHA <sub>$t_{\text{RIE}}$</sub>  measured in vacuum mode at room temperature.

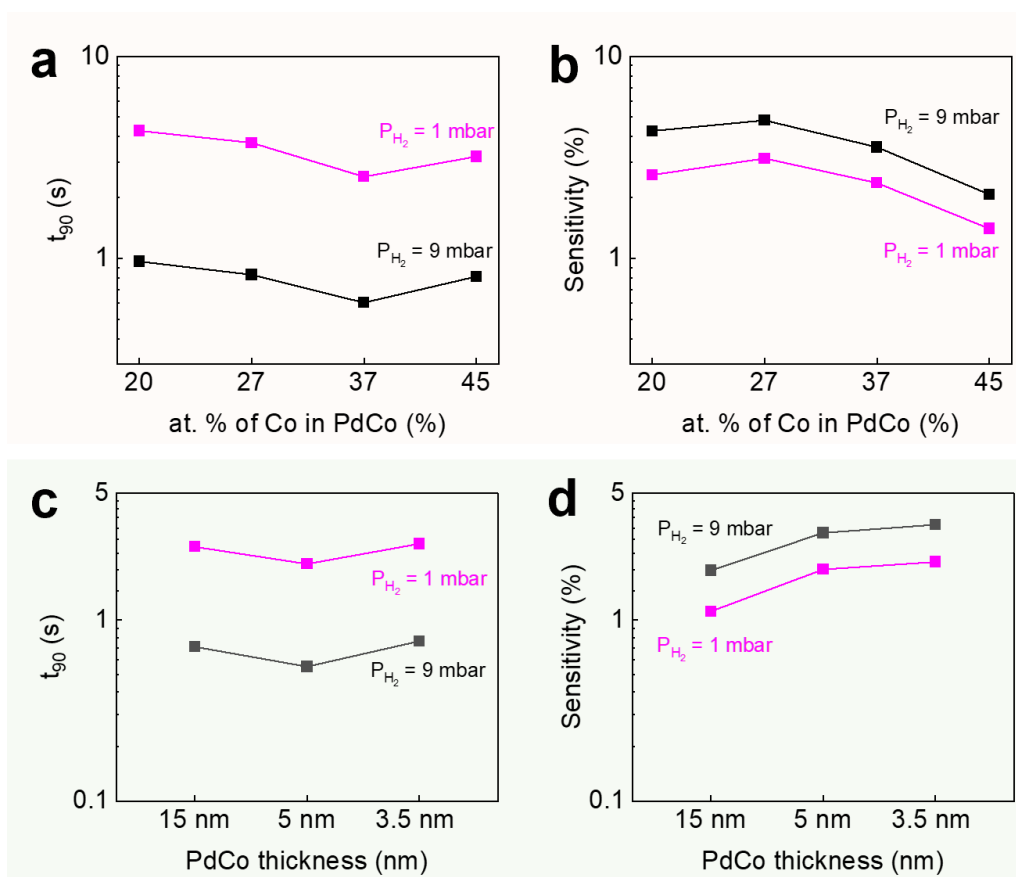

**Figure S16.** (a-b) Pd:Co composition-dependent and (c-d) PdCo thickness-dependent sensing performances of 20 nm C<sub>60</sub>/PdCo CHA<sub>185</sub>.

1  
2  
3

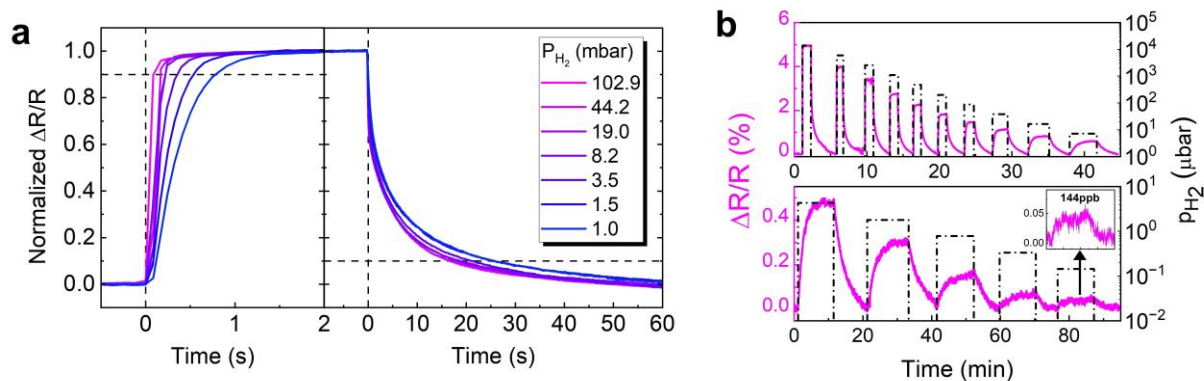

**Figure S17.** Sensing performances of 20 nm  $C_{60}$ /5 nm PdCo/30 nm TAF  $CHA_{185}$ . (a) Normalized absorption/desorption (left/right) kinetic of the sensor in response to varying  $H_2$  pressure from 100 to 1 mbar measured at 12.2 Hz sampling frequency. (b)  $\Delta R/R$  response to stepwise decreasing partial  $H_2$  pressures of (top) 13880 – 7.2  $\mu\text{bar}$  and (bottom) 4.32 – 0.144  $\mu\text{bar}$  measured at 8.4 Hz sampling frequency. All measurements were performed in vacuum mode at room temperature.

1

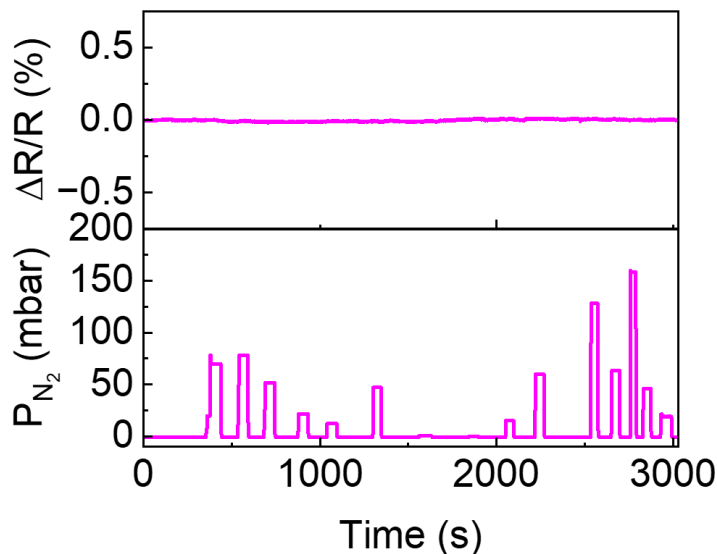

**Figure S18.** Controlled experiment of 20 nm  $C_{60}$ /3nm TAF/5 nm PdCo/30 nm TAF  $CHA_{185}$  sensor with pure  $N_2$ . Top panel shows the sensor's response to the corresponding step-wise  $N_2$  pressure pulses (from 0.1 to < 200 mbar) in the bottom panel. The experiment were performed in vacuum mode at room temperature and at sampling frequency  $f_{\text{sampling}} = 12.2$  Hz.

2

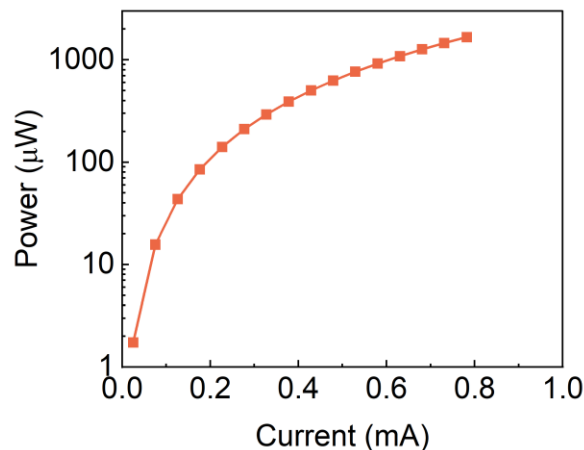

**Figure S19.** Measured power of the 20 nm C<sub>60</sub>/3nm TAF/5 nm PdCo/30 nm TAF CHA<sub>450</sub> sensor.

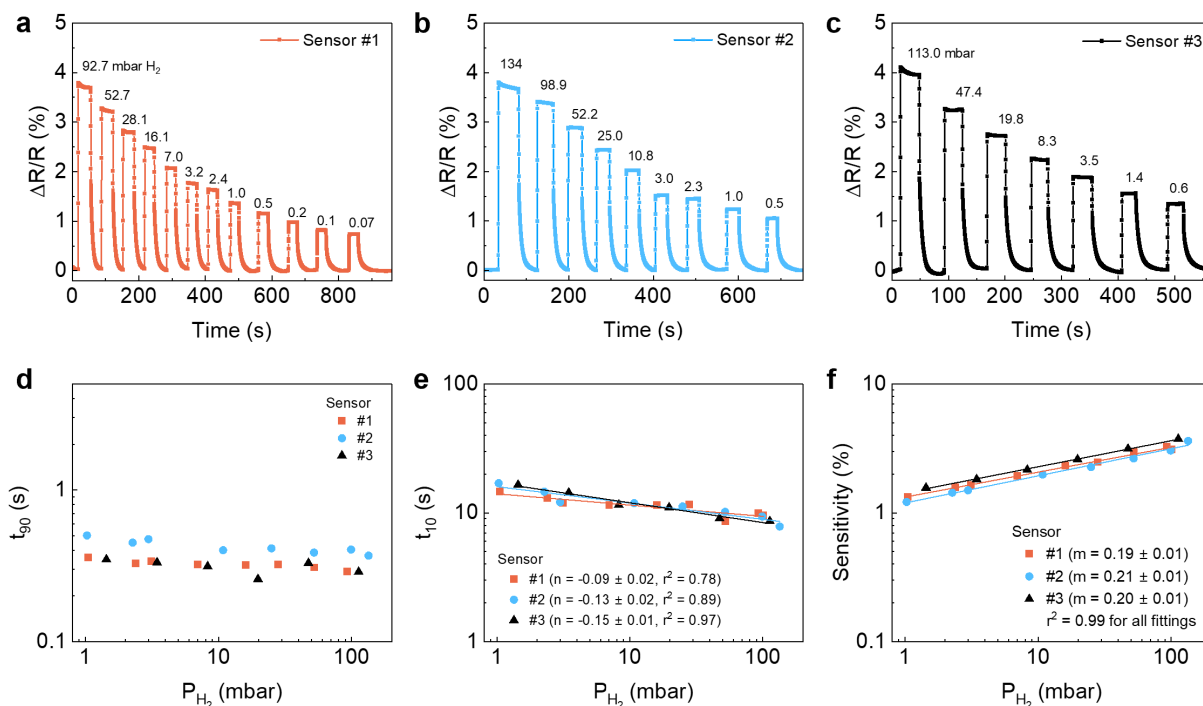

**Figure S20.** Sensing performances of 20 nm C<sub>60</sub>/3nm TAF/5 nm PdCo/30 nm TAF CHA<sub>450</sub> sensors. (a)(b)(c)  $\Delta R/R$  responses of 3 sensors with the same device structure to stepwise decreasing H<sub>2</sub> pressures of ~100 to < 1 mbar ( $f_{\text{sampling}} = 12.2$  Hz). (d) Absorption time ( $t_{90}$ ), (e) desorption time ( $t_{10}$ ) and (f) sensitivity of the 3 sensors extracted from (a-c). All measurements were performed in vacuum mode at room temperature. Note that the data presented in Fig. S20 d&e are identical with the ones shown in the main text Fig. 6b.



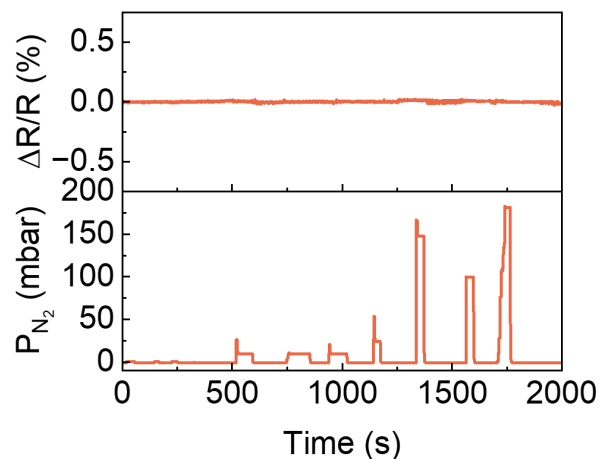

**Figure S21.** Controlled experiment of 20 nm C<sub>60</sub>/3nm TAF/5 nm PdCo/30 nm TAF CHA<sub>450</sub> sensor with pure N<sub>2</sub>. Top panel shows the sensor's response to the corresponding step-wise N<sub>2</sub> pressure pulses (from 0.1 to < 200 mbar) in the bottom panel. The experiment were performed in vacuum mode at room temperature and at sampling frequency  $f_{\text{sampling}} = 12.2$  Hz.

## 1 S6. Noise evaluation

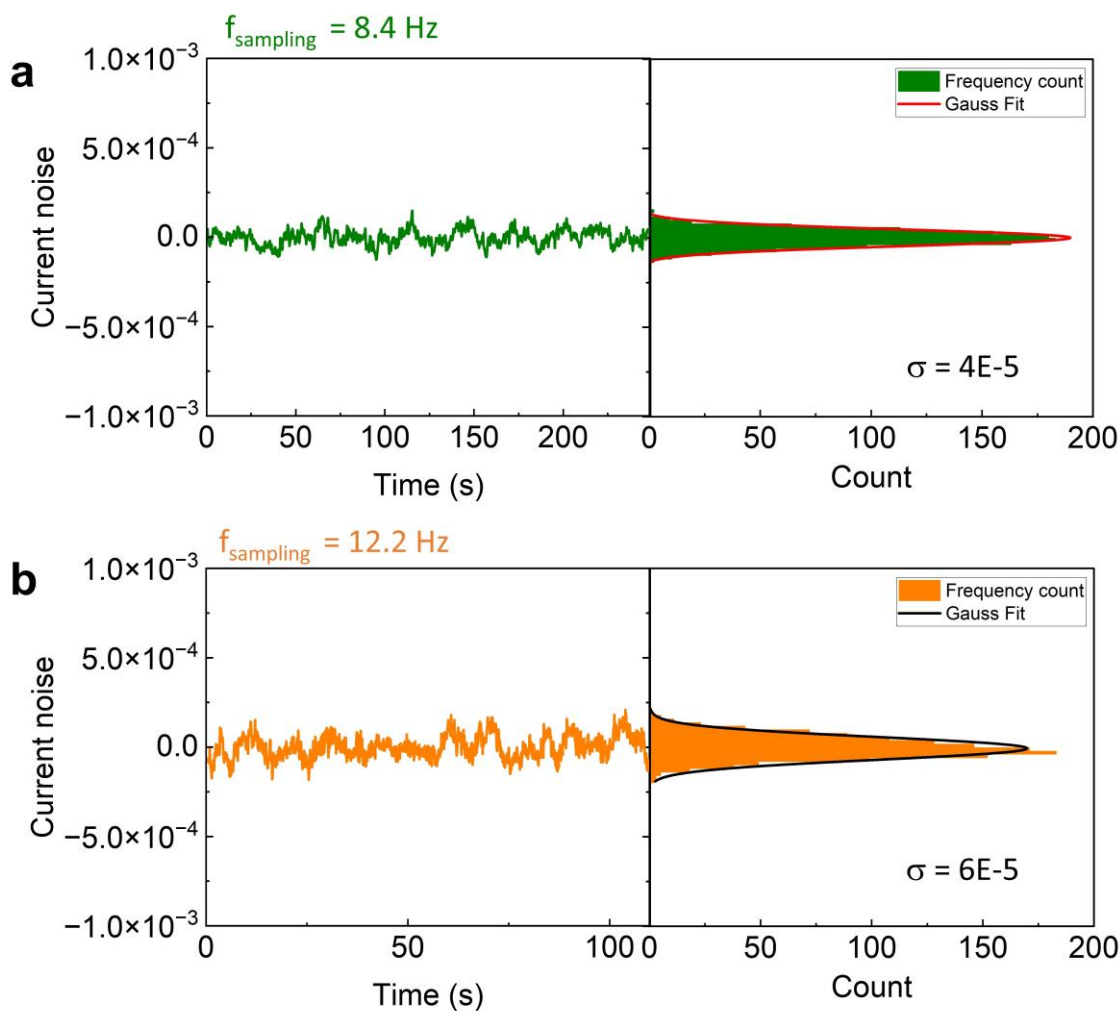

**Figure S22. (left panel)** Experimental current noise or resistance noise (defined as  $\Delta I/I = \Delta R/R$ ) versus acquisition time of the 20 nm  $\text{C}_{60}$ /5 nm PdCo/30 nm TAF  $\text{CHA}_{185\text{s}}$  at different sampling frequency: **(a)**  $f_{\text{sampling}} = 8.4 \text{ Hz}$  and **(b)**  $f_{\text{sampling}} = 12.2 \text{ Hz}$ .  $\Delta I$  is the fluctuation of the electric current around the equilibrium current,  $I$ . **(right panel)** Histogram plot of signal intensity. By definition, the LOD is  $3\sigma$  with  $\sigma$  is the standard deviation extracted from the Gaussian Fits. Thus, at  $f_{\text{sampling}} = 8.4 \text{ Hz}$ ,  $3\sigma = 0.012\%$ ; and at  $f_{\text{sampling}} = 12.2 \text{ Hz}$ ,  $3\sigma = 0.018\%$ .

2  
3

## 1 S7. Interference gases and humidity tests

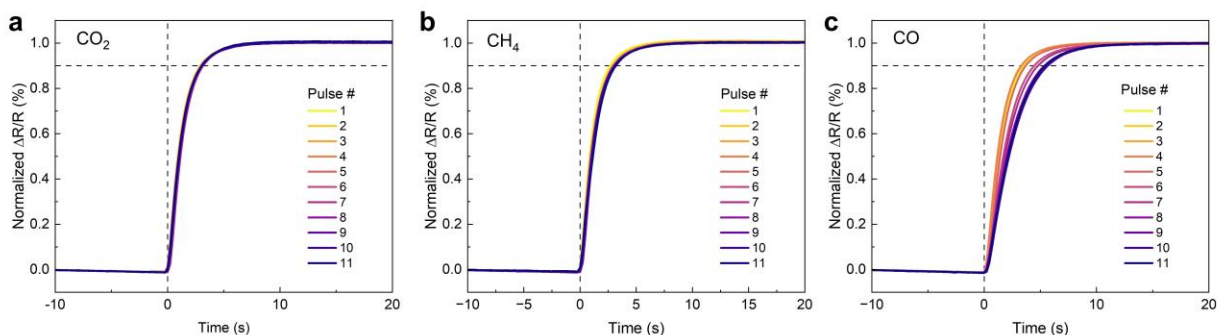

**Figure S23.** Normalized resistance dynamics of 20 nm  $C_{60}/5$  nm PdCo/TAF/PMMA  $CHA_{450}$  sensor under the influence of interference gases extracted from **Figure 6c**. Pulses #1-3 and #9-11 are 2%  $H_2$ , and pulses #4-8 are a mixture of 2%  $H_2$  and (a) 5%  $CO_2$  or (b) 5%  $CH_4$  or (c) 0.2%  $CO$ .

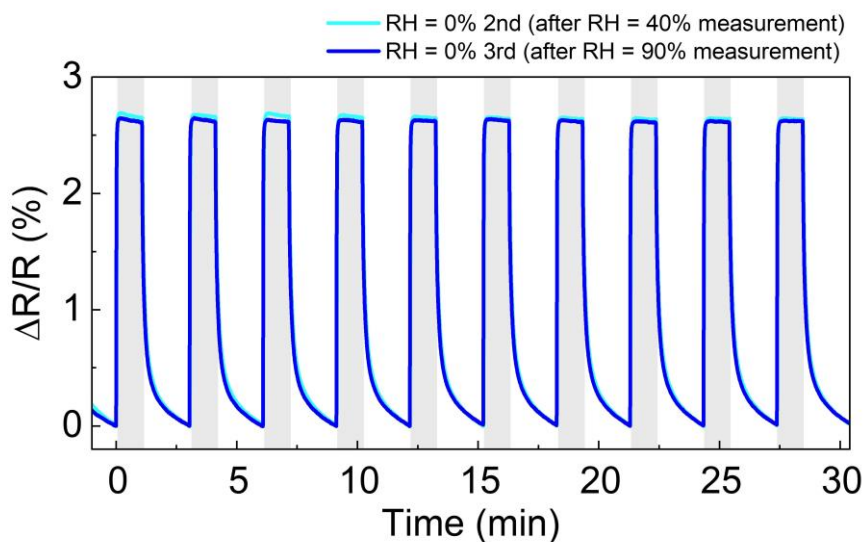

**Figure S24.** Time-resolved  $\Delta R/R$  response of the 20 nm  $C_{60}/5$  nm PdCo/TAF/PMMA  $CHA_{450}$  to 10 pulses of 2%  $H_2$  with relative humidities (RH) of 0%, measured after the RH test.

1 **S8. Pressure transducer's reaction time**

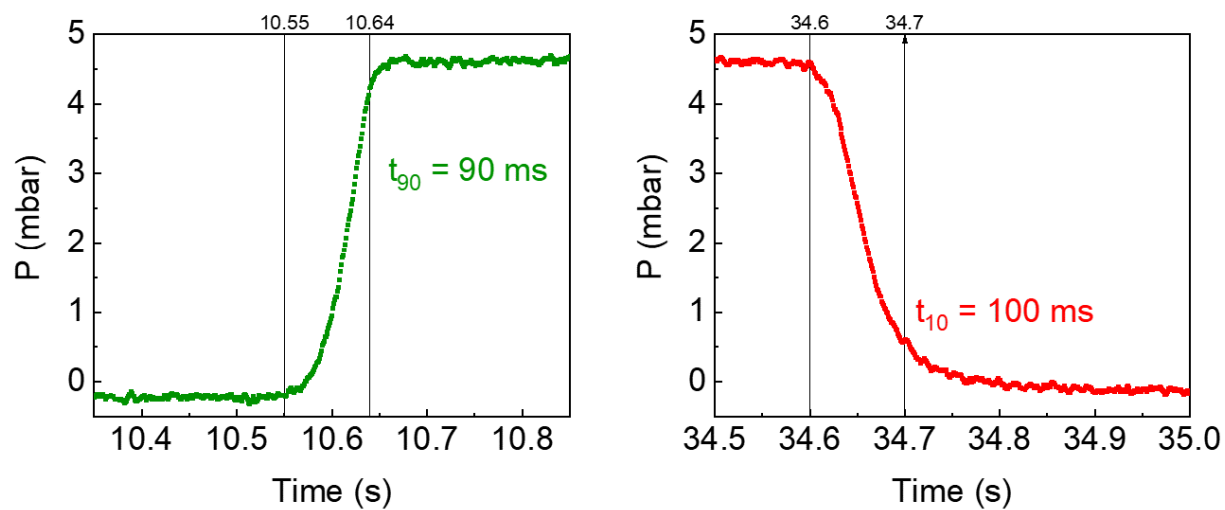

**Figure S25.** Reaction time of the pressure transducers while (a) loading and (b) unloading  $\text{H}_2$  in the sensor chamber.

2

## Supplementary references

- 1 Energy Efficiency and Renewable Energy (EERE), F. C. T. O. *Multi-Year Research, Development, and Demonstration Plan, 2011–2020. Section 3.7 Hydrogen Safety, Codes and Standards*;  
<[https://www.energy.gov/sites/prod/files/2015/06/f23/fcto\\_myrrdd\\_safety\\_codes.pdf](https://www.energy.gov/sites/prod/files/2015/06/f23/fcto_myrrdd_safety_codes.pdf)> (2015).
- 2 Energy Efficiency and Renewable Energy (EERE), E. E. a. R. E. *Funding Opportunity in Support of the Hydrogen Shot and a University Research Consortium on Grid Resilience*, <<https://eere-exchange.energy.gov/Default.aspx?foaId=47252393-c846-4779-9760-86414eddda9f#FoaId47252393-c846-4779-9760-86414eddda9f>> (2022).
- 3 Moon, J., Hedman, H.-P., Kemell, M., Tuominen, A. & Punkkinen, R. Hydrogen sensor of Pd-decorated tubular TiO<sub>2</sub> layer prepared by anodization with patterned electrodes on SiO<sub>2</sub>/Si substrate. *Sensors and Actuators B: Chemical* **222**, 190-197 (2016).  
<https://doi.org/https://doi.org/10.1016/j.snb.2015.08.054>
- 4 Luong, H. M. *et al.* Bilayer plasmonic nano-lattices for tunable hydrogen sensing platform. *Nano Energy* **71**, 104558 (2020).  
<https://doi.org/https://doi.org/10.1016/j.nanoen.2020.104558>
- 5 He, J. *et al.* Integrating plasmonic nanostructures with natural photonic architectures in Pd-modified <i>Morpho</i> butterfly wings for sensitive hydrogen gas sensing. *RSC Advances* **8**, 32395-32400 (2018). <https://doi.org/10.1039/c8ra05046e>
- 6 Pham, M. T. *et al.* Pd<sub>80</sub>Co<sub>20</sub> Nanohole Arrays Coated with Poly(methyl methacrylate) for High-Speed Hydrogen Sensing with a Part-per-Billion Detection Limit. *ACS Applied Nano Materials* **4**, 3664-3674 (2021). <https://doi.org/10.1021/acsanm.1c00169>
- 7 Nugroho, F. A. A., Darmadi, I., Zhdanov, V. P. & Langhammer, C. Universal Scaling and Design Rules of Hydrogen-Induced Optical Properties in Pd and Pd-Alloy Nanoparticles. *ACS Nano* **12**, 9903-9912 (2018). <https://doi.org/10.1021/acsnano.8b02835>
- 8 Luong, H. M. *et al.* Sub-second and ppm-level optical sensing of hydrogen using templated control of nano-hydride geometry and composition. *Nature Communications* **12**, 2414 (2021). <https://doi.org/10.1038/s41467-021-22697-w>
- 9 Lupan, O. *et al.* Ultra-sensitive and selective hydrogen nanosensor with fast response at room temperature based on a single Pd/ZnO nanowire. *Sensors and Actuators B: Chemical* **254**, 1259-1270 (2018). <https://doi.org/https://doi.org/10.1016/j.snb.2017.07.200>
- 10 Luong, H. M. *et al.* Ultra-fast and sensitive magneto-optical hydrogen sensors using a magnetic nano-cap array. *Nano Energy* **109**, 108332 (2023).  
<https://doi.org/https://doi.org/10.1016/j.nanoen.2023.108332>
- 11 Nugroho, F. A. A. *et al.* Metal–polymer hybrid nanomaterials for plasmonic ultrafast hydrogen detection. *Nature Materials* **18**, 489-495 (2019). <https://doi.org/10.1038/s41563-019-0325-4>
- 12 Jo, M.-S. *et al.* Ultrafast (~0.6 s), Robust, and Highly Linear Hydrogen Detection up to 10% Using Fully Suspended Pure Pd Nanowire. *ACS Nano* **17**, 23649-23658 (2023).  
<https://doi.org/10.1021/acsnano.3c06806>
- 13 Bi, S. *et al.* High-performance palladium nanotube network as fast, high-resolution, and wide range hydrogen detector in atmosphere. *Sensors and Actuators B: Chemical* **404**, 135307 (2024). <https://doi.org/https://doi.org/10.1016/j.snb.2024.135307>
- 14 Lee, E. *et al.* Hydrogen gas sensing performance of Pd–Ni alloy thin films. *Thin Solid Films* **519**, 880-884 (2010). <https://doi.org/https://doi.org/10.1016/j.tsf.2010.07.122>

- 15 Koo, W.-T. *et al.* Accelerating Palladium Nanowire H<sub>2</sub> Sensors Using Engineered Nanofiltration. *ACS Nano* **11**, 9276-9285 (2017). <https://doi.org/10.1021/acsnano.7b04529>
- 16 Cho, S.-Y. *et al.* Ultrasmall Grained Pd Nanopattern H<sub>2</sub> Sensor. *ACS Sensors* **3**, 1876-1883 (2018). <https://doi.org/10.1021/acssensors.8b00834>
- 17 Hassan, K. & Chung, G.-S. Fast and reversible hydrogen sensing properties of Pd-capped Mg ultra-thin films modified by hydrophobic alumina substrates. *Sensors and Actuators B: Chemical* **242**, 450-460 (2017). <https://doi.org/10.1016/j.snb.2016.11.078>
- 18 Rajoua, K., Baklouti, L. & Favier, F. Electronic and Mechanical Antagonist Effects in Resistive Hydrogen Sensors Based on Pd@Au Core–Shell Nanoparticle Assemblies Prepared by Langmuir–Blodgett. *The Journal of Physical Chemistry C* **119**, 10130-10139 (2015). <https://doi.org/10.1021/acs.jpcc.5b01636>
- 19 Zeng, X. Q. *et al.* Hydrogen Gas Sensing with Networks of Ultrasmall Palladium Nanowires Formed on Filtration Membranes. *Nano Letters* **11**, 262-268 (2011). <https://doi.org/10.1021/nl103682s>
- 20 Gao, M., Cho, M., Han, H.-J., Jung, Y. S. & Park, I. Palladium-Decorated Silicon Nanomesh Fabricated by Nanosphere Lithography for High Performance, Room Temperature Hydrogen Sensing. *Small* **14**, 1703691 (2018). <https://doi.org/10.1002/sml.201703691>
- 21 Shim, Y.-S. *et al.* Nanogap-controlled Pd coating for hydrogen sensitive switches and hydrogen sensors. *Sensors and Actuators B: Chemical* **255**, 1841-1848 (2018). <https://doi.org/10.1016/j.snb.2017.08.198>
- 22 Chen, W. P. *et al.* Extraordinary room-temperature hydrogen sensing capabilities of porous bulk Pt–TiO<sub>2</sub> nanocomposite ceramics. *International Journal of Hydrogen Energy* **41**, 3307-3312 (2016). <https://doi.org/10.1016/j.ijhydene.2015.12.151>
- 23 Chen, R., Ruan, X., Liu, W. & Stefanini, C. A reliable and fast hydrogen gas leakage detector based on irreversible cracking of decorated palladium nanolayer upon aligned polymer fibers. *International Journal of Hydrogen Energy* **40**, 746-751 (2015). <https://doi.org/10.1016/j.ijhydene.2014.11.026>
- 24 Lim, S. H. *et al.* Flexible Palladium-Based H<sub>2</sub> Sensor with Fast Response and Low Leakage Detection by Nanoimprint Lithography. *ACS Applied Materials & Interfaces* **5**, 7274-7281 (2013). <https://doi.org/10.1021/am401624r>
- 25 Chung, M. G. *et al.* Flexible hydrogen sensors using graphene with palladium nanoparticle decoration. *Sensors and Actuators B: Chemical* **169**, 387-392 (2012). <https://doi.org/10.1016/j.snb.2012.05.031>
- 26 Lee, J., Shim, W., Lee, E., Noh, J.-S. & Lee, W. Highly Mobile Palladium Thin Films on an Elastomeric Substrate: Nanogap-Based Hydrogen Gas Sensors. *Angewandte Chemie International Edition* **50**, 5301-5305 (2011). <https://doi.org/10.1002/anie.201100054>
- 27 Kiefer, T., Villanueva, L. G., Fargier, F., Favier, F. & Brugger, J. Fast and robust hydrogen sensors based on discontinuous palladium films on polyimide, fabricated on a wafer scale. *Nanotechnology* **21**, 505501 (2010). <https://doi.org/10.1088/0957-4484/21/50/505501>
- 28 Villanueva, L. G. *et al.* Highly ordered palladium nanodot patterns for full concentration range hydrogen sensing. *Nanoscale* **4**, 1964-1967 (2012). <https://doi.org/10.1039/C2NR11983H>
- 29 Behzadi pour, G. & Fekri aval, L. Highly sensitive work function hydrogen gas sensor based on PdNPs/SiO<sub>2</sub>/Si structure at room temperature. *Results in Physics* **7**, 1993-1999 (2017). <https://doi.org/10.1016/j.rinp.2017.06.026>

- 1 30 Han, M., Jung, D. & Lee, G. S. Palladium-nanoparticle-coated carbon nanotube gas sensor.  
2 *Chemical Physics Letters* **610-611**, 261-266 (2014).  
3 <https://doi.org/10.1016/j.cplett.2014.07.053>  
4 31 Ai, B. *Glancing angle deposition*, <[http://ailabcqu.com/GLAD?\\_l=en](http://ailabcqu.com/GLAD?_l=en)>  
5 32 Sartorius, S. *Surface area*, <[https://www.mathworks.com/matlabcentral/fileexchange/62992-](https://www.mathworks.com/matlabcentral/fileexchange/62992-surface-area)  
6 [surface-area](https://www.mathworks.com/matlabcentral/fileexchange/62992-surface-area)> (2024).  
7 33 Wang, Y., Yang, F., Zhang, Z. & Zhao, Y. Performance of Transparent Metallic Thin Films.  
8 *The Journal of Physical Chemistry C* **125**, 16334-16342 (2021).  
9 <https://doi.org/10.1021/acs.jpcc.1c04832>  
10 34 Lacy, F. Developing a theoretical relationship between electrical resistivity, temperature,  
11 and film thickness for conductors. *Nanoscale Research Letters* **6**, 636 (2011).  
12 <https://doi.org/10.1186/1556-276x-6-636>

13
